# Supplementary material for: METTL3 affects FLT3-ITD+ Acute Myeloid Leukemia by mediating autophagy by regulating PSMA3-AS1 stability
Source: Research Square preprint supplement (doi:10.21203/rs.3.rs-1700325/v2), 2022-06-24
Supplement: Supplementary file 1 [file 390ad7754c1e7810bf025c0b.docx]

Table 2 Primer Sequences for qRT-PCR

| **Genes** | **Sequences（5’-3’）** |
| --- | --- |
| **PSMA3-AS1** |  |
| Forward primer | AACAGACCATCAGAAGAGAACA |
| Reverse primer | GAACAGAAACCAGAGCCATACA |
| **miR-20a-5p** |  |
| Forward primer | GTAAAGTGCTTATAGTGCAG |
| Reverse primer | GTCGTATCCAGTGCGTGTCG |
| **ATG16L1** |  |
| Forward primer | CAGAGCAGCTACTAAGCGACT |
| Reverse primer | AAAAGGGGAGATTCGGACAGA |
| **METTL3** |  |
| Forward primer | 5’- CCCGCGGATATTCACATGGAACTGCC-3’ |
| Reverse primer | 5’- TGGGGCAGCCATCACAACTGCAAAC-3’ |
| **Beclin1** |  |
| Forward primer | 5’-GGCCAATAAGATGGGTCTGA-3’ |
| Reverse primer | 5’-GCTGCACACAGTCCAGAAAA-3’ |
| **P62** |  |
| Forward primer | 5’-TGTGGAACATGGAGGGAAG-3’ |
| Reverse primer | 5’-TGTGCCTGTGCTGGAACTTTC-3’ |
| **LC3** |  |
| Forward primer | 5’-TTGGTCAAGATCATCCGGC-3’ |
| Reverse primer | 5’-GCTCACCATGCTGTGCTGG-3’ |
| **GAPDH** |  |
| Forward primer | CTGGGCTACACTGAGCACC |
| Reverse primer | AGTGGTCGTTGAGGGCAATG |
| **U6** |  |
| Forward primer | CTCGCTTCGGCAGCACA |
| Reverse primer | AACGCTTCACGAATTTGCGT |
